# Supplementary material for: Zinc oxide nanoring embedded lacey graphene nanoribbons in symmetric/asymmetric electrochemical capacitive energy storage
Source: Royal Society of Chemistry journal article supplement (doi:10.1039/c5nr06083d), 2015-01-01
Supplement: c5nr06083d1.pdf [file c5nr06083d1.pdf]

# Zinc Oxide Nanoring Embedded Lacey Graphene Nanoribbons in Symmetric/Asymmetric Electrochemical Capacitive Energy Storage

Vikrant Sahu, Shubhra Goel, Gurmeet Singh\* and Raj Kishore Sharma\*\*

Department of Chemistry, University of Delhi, Delhi-110007, INDIA

## SUPPORTING INFORMATION

### X-ray Photoelectron Spectra of LGONR:

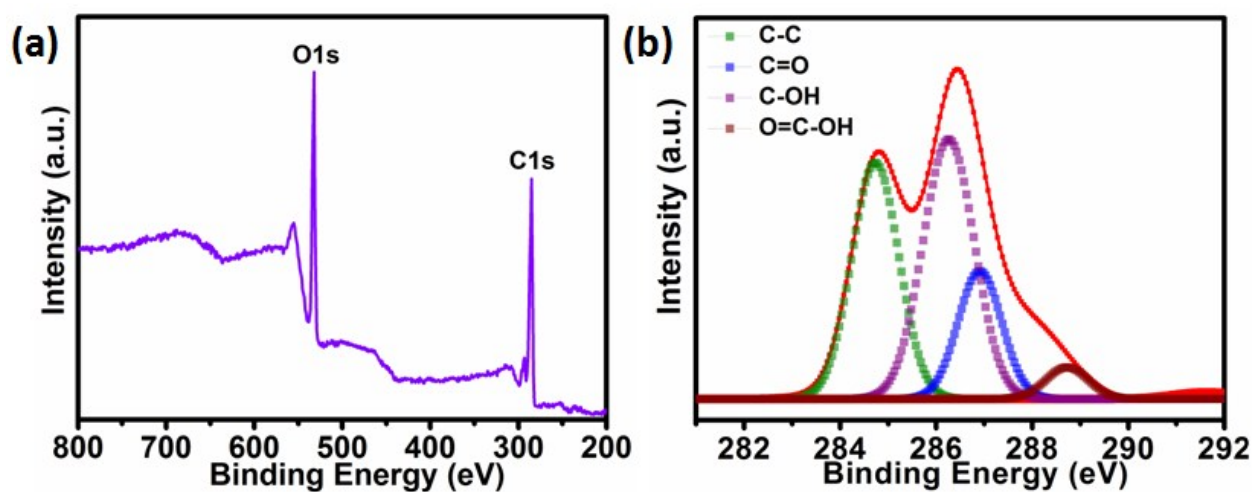

Fig. S1 (a) Surface scan spectra of LGONR, and (b) Core level (C 1s) spectra of LGONR.

Fig. S1 presents the details of XPS characterization for LGONR. In the Fig. S1(a), two prominent peaks attributed to O 1s and C 1s are observed. The ratio of Carbon:Oxygen as 1.1 is indicative of high oxidation state of lacey graphene nanoribbon. The Core level C 1s spectrum shown in Fig. S1(b) reveals peaks at 284.7 eV, 286.2 eV, 286.8 eV and 288.7 eV ascribed to the chemical functionalities C-C, C-OH, C=O and O=C-OH respectively in LGONR. The results correlate with the XRD analysis for LGONR.
